# Supplementary material for: Uric Acid Levels, Number of Standard Modifiable Cardiovascular Risk Factors, and Prognosis in Patients With Coronary Artery Disease: A Large Cohort Study in Asia
Source: PubMed Central journal article supplement — J Am Heart Assoc. 2023 Oct 17;12(20):e030625. doi: 10.1161/JAHA.123.030625 (PMC10757509; doi:10.1161/jaha.123.030625), 2023-10-17
Supplement: JAH3-12-e030625-s001.pdf [file JAH3-12-e030625-s001.pdf]

# **SUPPLEMENTAL MATERIAL**

**Table S1. Baseline patient, angiographic and procedural characteristics according to number of SMuRFs.**

| Variable                                   | Overall (n=10486) | 0~1 SMuRF (n=2277) | 2~3 SMuRFs (n=6945) | 4 SMuRFs (n=1264) | P value        |
|--------------------------------------------|-------------------|--------------------|---------------------|-------------------|----------------|
| Age, years                                 | 59 (51-65)        | 59 (50-65)         | 59 (51-66)          | 58 (50-65)        | 0.129          |
| Male, n (%)                                | 8094 (77.2)       | 1558 (68.4)        | 5341 (76.9)         | 1195 (94.5)       | < <b>0.001</b> |
| Body mass index, kg/m <sup>2</sup>         | 25.9 (23.9-27.8)  | 25.1 (23.2-27.2)   | 26.0 (24.0-27.9)    | 26.6 (24.7-28.7)  | < <b>0.001</b> |
| Current smoker, n (%)                      | 5990 (57.1)       | 633 (27.8)         | 4093 (58.9)         | 1264 (100)        | < <b>0.001</b> |
| Diabetes mellitus, n (%)                   | 4430 (42.2)       | 217 (9.5)          | 2949 (42.5)         | 1264 (100)        | < <b>0.001</b> |
| Hypertension, n (%)                        | 6755 (64.4)       | 511 (22.4)         | 4980 (71.7)         | 1264 (100)        | < <b>0.001</b> |
| Dyslipidemia, n (%)                        | 7068 (67.4)       | 496 (21.8)         | 5308 (76.4)         | 1264 (100)        | < <b>0.001</b> |
| Previous myocardial infarction, n (%)      | 1965 (18.7)       | 358 (15.7)         | 1307 (18.8)         | 300 (23.7)        | < <b>0.001</b> |
| Previous PCI, n (%)                        | 2553 (24.3)       | 426 (18.7)         | 1717 (24.7)         | 410 (32.4)        | < <b>0.001</b> |
| Previous CABG, n (%)                       | 423 (4.0)         | 73 (3.2)           | 261 (3.8)           | 89 (7.0)          | < <b>0.001</b> |
| Previous stroke, n (%)                     | 1120 (10.7)       | 117 (5.1)          | 811 (11.7)          | 192 (15.2)        | < <b>0.001</b> |
| Peripheral vascular disease, n (%)         | 282 (2.7)         | 30 (1.3)           | 186 (2.7)           | 66 (5.2)          | < <b>0.001</b> |
| eGFR < 60ml/min/1.73m <sup>2</sup> , n (%) | 309 (3.1)         | 50 (2.3)           | 208 (3.1)           | 51 (4.2)          | <b>0.009</b>   |
| COPD, n (%)                                | 241 (2.3)         | 40 (1.8)           | 170 (2.4)           | 31 (2.5)          | 0.150          |
| LVEF < 50%, n (%)                          | 410 (4.0)         | 92 (4.1)           | 264 (3.9)           | 54 (4.4)          | 0.713          |
| Acute coronary syndrome, n (%)             | 6272 (59.8)       | 1443 (63.4)        | 4078 (58.7)         | 751 (59.4)        | < <b>0.001</b> |

|                                      |                  |                  |                  |                  |                |
|--------------------------------------|------------------|------------------|------------------|------------------|----------------|
| Systolic blood pressure, mmHg        | 125 (120-140)    | 120 (110-130)    | 129 (120-140)    | 130 (120-140)    | < <b>0.001</b> |
| Laboratory data                      |                  |                  |                  |                  |                |
| Triglyceride, mmol/L                 | 1.53 (1.14-2.10) | 1.40 (1.07-1.90) | 1.55 (1.15-2.13) | 1.66 (1.25-2.34) | < <b>0.001</b> |
| Total cholesterol, mmol/L            | 4.05 (3.44-4.81) | 4.10 (3.46-4.85) | 4.05 (3.45-4.81) | 3.95 (3.36-4.71) | <b>0.002</b>   |
| LDL-C, mmol/L                        | 2.35 (1.86-3.01) | 2.42 (1.87-3.07) | 2.35 (1.86-3.01) | 2.26 (1.82-2.90) | < <b>0.001</b> |
| HDL-C, mmol/L                        | 0.99 (0.84-1.18) | 1.04 (0.88-1.25) | 0.99 (0.84-1.17) | 0.93 (0.80-1.09) | < <b>0.001</b> |
| Hemoglobin A1c, %                    | 6.2 (5.8-7.0)    | 5.9 (5.7-6.2)    | 6.2 (5.8-7.0)    | 7.1 (6.6-8.2)    | < <b>0.001</b> |
| Uric acid, mg/dl                     | 5.64 (4.78-6.58) | 5.43 (4.58-6.33) | 5.69 (4.82-6.63) | 5.68 (4.86-6.73) | < <b>0.001</b> |
| Radial artery access, n (%)          | 8853 (91.4)      | 1872 (91.2)      | 5921 (91.6)      | 1060 (90.3)      | 0.315          |
| Three-vessel disease, n (%)          | 4539 (43.3)      | 860 (37.8)       | 3013 (43.4)      | 666 (52.7)       | < <b>0.001</b> |
| SYNTAX score                         | 10 (6-17)        | 10 (6-17)        | 10 (6-17)        | 11 (6-17)        | 0.116          |
| Type B2 or C lesion, n (%)           | 8063 (76.9)      | 1708 (75.0)      | 5348 (77.0)      | 1007 (79.7)      | <b>0.007</b>   |
| No. lesions treated $\geq 3$ , n (%) | 714 (6.8)        | 113 (5.0)        | 489 (7.0)        | 112 (8.9)        | < <b>0.001</b> |
| No. stents $\geq 3$ , n (%)          | 2327 (22.2)      | 453 (19.9)       | 1554 (22.4)      | 320 (25.3)       | <b>0.001</b>   |
| Use of EES/ZES, n (%)                | 5477 (52.2)      | 1223 (53.7)      | 3605 (51.9)      | 649 (51.2)       | 0.261          |
| Minimum stent diameter, mm           | 2.75 (2.50-3.00) | 3.00 (2.50-3.50) | 2.75 (2.50-3.00) | 2.75 (2.50-3.00) | < <b>0.001</b> |
| Total stent length, mm               | 36 (23-55)       | 33 (23-52)       | 36 (23-55)       | 39 (24-59)       | < <b>0.001</b> |
| Medications at discharge             |                  |                  |                  |                  |                |
| Aspirin, n (%)                       | 10348 (98.7)     | 2248 (98.7)      | 6847 (98.6)      | 1253 (99.1)      | 0.294          |

|                                             |              |             |             |             |                |
|---------------------------------------------|--------------|-------------|-------------|-------------|----------------|
| P2Y <sub>12</sub> receptor inhibitor, n (%) | 10326 (98.5) | 2231 (98.0) | 6847 (98.6) | 1248 (98.7) | 0.087          |
| β-blockers, n (%)                           | 9447 (90.1)  | 2011 (88.3) | 6262 (90.2) | 1174 (92.9) | < <b>0.001</b> |
| Statins, n (%)                              | 10056 (95.9) | 2196 (96.4) | 6650 (95.8) | 1210 (95.7) | 0.335          |
| Calcium channel blockers, n (%)             | 5138 (49.0)  | 940 (41.3)  | 3485 (50.2) | 713 (56.4)  | < <b>0.001</b> |

CABG, coronary artery bypass grafting; COPD, chronic obstructive pulmonary disease; EES, everolimus-eluting stent; eGFR, estimated glomerular filtration rate; HDL-C, high-density lipoprotein cholesterol; LDL-C, low-density lipoprotein cholesterol; LVEF, left ventricular ejection fraction; PCI, percutaneous coronary intervention; SMuRFs, standard modifiable cardiovascular risk factors; SYNTAX, synergy between percutaneous coronary intervention with TAXUS and cardiac surgery; ZES, zotarolimus-eluting stent.

**Table S2. Clinical outcomes according to serum uric acid tertiles in the overall population.**

| Clinical outcomes           | Group               | Event, n (%) | HR (95%CI)                  |                             |
|-----------------------------|---------------------|--------------|-----------------------------|-----------------------------|
|                             |                     |              | Unadjusted model            | Adjusted model              |
| MACCE                       | Low uric acid       | 374 (10.7)   | 1 (reference)               | 1 (reference)               |
|                             | Medium uric acid    | 402 (11.5)   | 1.086 (0.943, 1.250)        | 1.039 (0.888, 1.217)        |
|                             | High uric acid      | 457 (13.1)   | <b>1.123 (1.048, 1.202)</b> | <b>1.103 (1.016, 1.198)</b> |
|                             | Per 1mg/dl increase | 1233 (11.8)  | <b>1.067 (1.027, 1.109)</b> | <b>1.057 (1.011, 1.106)</b> |
| All-cause death             | Low uric acid       | 31 (0.9)     | 1 (reference)               | 1 (reference)               |
|                             | Medium uric acid    | 45 (1.3)     | 1.458 (0.923, 2.304)        | 1.492 (0.904, 2.462)        |
|                             | High uric acid      | 45 (1.3)     | 1.214 (0.966, 1.526)        | 1.254 (0.962, 1.636)        |
|                             | Per 1mg/dl increase | 121 (1.2)    | 1.120 (0.994, 1.262)        | 1.141 (0.997, 1.305)        |
| Cardiac death               | Low uric acid       | 10 (0.3)     | 1 (reference)               | 1 (reference)               |
|                             | Medium uric acid    | 24 (0.7)     | <b>2.404 (1.149, 5.026)</b> | <b>2.336 (1.020, 5.349)</b> |
|                             | High uric acid      | 26 (0.7)     | <b>1.620 (1.125, 2.333)</b> | <b>1.661 (1.083, 2.546)</b> |
|                             | Per 1mg/dl increase | 60 (0.6)     | <b>1.266 (1.080, 1.485)</b> | <b>1.249 (1.042, 1.496)</b> |
| Nonfatal MI                 | Low uric acid       | 23 (0.7)     | 1 (reference)               | 1 (reference)               |
|                             | Medium uric acid    | 29 (0.8)     | 1.270 (0.735, 2.196)        | 1.358 (0.737, 2.502)        |
|                             | High uric acid      | 43 (1.2)     | <b>1.387 (1.077, 1.787)</b> | <b>1.477 (1.091, 1.999)</b> |
|                             | Per 1mg/dl increase | 95 (0.9)     | <b>1.161 (1.016, 1.326)</b> | <b>1.171 (1.009, 1.358)</b> |
| Stroke                      | Low uric acid       | 59 (1.7)     | 1 (reference)               | 1 (reference)               |
|                             | Medium uric acid    | 56 (1.6)     | 0.954 (0.662, 1.375)        | 0.883 (0.590, 1.323)        |
|                             | High uric acid      | 56 (1.6)     | 0.987 (0.822, 1.186)        | 0.977 (0.791, 1.206)        |
|                             | Per 1mg/dl increase | 171 (1.6)    | 0.988 (0.889, 1.099)        | 0.970 (0.859, 1.096)        |
| Unplanned revascularization | Low uric acid       | 284 (8.1)    | 1 (reference)               | 1 (reference)               |
|                             | Medium uric acid    | 309 (8.8)    | 1.099 (0.935, 1.291)        | 1.066 (0.888, 1.279)        |
|                             | High uric acid      | 355 (10.2)   | <b>1.133 (1.048, 1.224)</b> | <b>1.114 (1.014, 1.223)</b> |
|                             | Per 1mg/dl increase | 948 (9.0)    | <b>1.073 (1.027, 1.121)</b> | <b>1.064 (1.011, 1.120)</b> |

Adjusted for age, sex, body mass index, current smoking, diabetes, hypertension, dyslipidemia, previous myocardial infarction, previous stroke, acute coronary syndrome, systolic blood pressure, triglyceride, low-density lipoprotein cholesterol, minimum stent diameter, total stent length, and use of statin at discharge. CI, confidence interval; HR, hazard ratio; MACCE, major adverse cardiovascular and cerebrovascular event; MI, myocardial infarction.

**Table S3. 2.4-year major adverse cardiovascular and cerebrovascular events in patients with and without diabetes according to acid tertiles.**

| Group               | Diabetes (n=4430) |                       |                      | No diabetes (n=6056) |                             |                             |
|---------------------|-------------------|-----------------------|----------------------|----------------------|-----------------------------|-----------------------------|
|                     | Event, n (%)      | Unadjusted HR (95%CI) | Adjusted HR (95%CI)  | Event, n (%)         | Unadjusted HR (95%CI)       | Adjusted HR (95%CI)         |
| Low uric acid       | 207 (12.2)        | 1 (reference)         | 1 (reference)        | 167 (9.3)            | 1 (reference)               | 1 (reference)               |
| Medium uric acid    | 184 (12.8)        | 1.053 (0.863, 1.284)  | 1.027 (0.829, 1.272) | 218 (10.6)           | 1.159 (0.947, 1.417)        | 1.101 (0.882, 1.373)        |
| High uric acid      | 186 (14.4)        | 1.102 (0.998, 1.217)  | 1.073 (0.958, 1.201) | 271 (12.3)           | <b>1.171 (1.063, 1.289)</b> | <b>1.122 (1.001, 1.257)</b> |
| Per 1mg/dl increase | 577 (13.0)        | 1.056 (0.999, 1.116)  | 1.047 (0.983, 1.114) | 656 (10.8)           | <b>1.090 (1.034, 1.150)</b> | <b>1.071 (1.005, 1.140)</b> |

Adjusted for age, sex, body mass index, current smoking, diabetes, hypertension, dyslipidemia, previous myocardial infarction, previous stroke, acute

coronary syndrome, systolic blood pressure, triglyceride, low-density lipoprotein cholesterol, minimum stent diameter, total stent length, and use of statin at

discharge. CI, confidence interval; HR, hazard ratio.

**Table S4. 2.4-year major adverse cardiovascular and cerebrovascular events in patients with and without hypertension according to uric acid tertiles.**

| Group               | Hypertension (n=6755) |                             |                      | No hypertension (n=3731) |                             |                             |
|---------------------|-----------------------|-----------------------------|----------------------|--------------------------|-----------------------------|-----------------------------|
|                     | Event, n (%)          | Unadjusted HR (95%CI)       | Adjusted HR (95%CI)  | Event, n (%)             | Unadjusted HR (95%CI)       | Adjusted HR (95%CI)         |
| Low uric acid       | 246 (11.3)            | 1 (reference)               | 1 (reference)        | 128 (9.8)                | 1 (reference)               | 1 (reference)               |
| Medium uric acid    | 266 (12.0)            | 1.079 (0.907, 1.283)        | 0.996 (0.822, 1.206) | 136 (10.6)               | 1.096 (0.861, 1.395)        | 1.171 (0.884, 1.553)        |
| High uric acid      | 312 (13.2)            | <b>1.098 (1.010, 1.194)</b> | 1.069 (0.968, 1.180) | 145 (12.8)               | <b>1.167 (1.036, 1.314)</b> | <b>1.190 (1.025, 1.381)</b> |
| Per 1mg/dl increase | 824 (12.2)            | <b>1.053 (1.005, 1.103)</b> | 1.036 (0.982, 1.094) | 409 (11.0)               | <b>1.094 (1.020, 1.173)</b> | <b>1.124 (1.034, 1.222)</b> |

Adjusted for age, sex, body mass index, current smoking, diabetes, hypertension, dyslipidemia, previous myocardial infarction, previous stroke, acute coronary syndrome, systolic blood pressure, triglyceride, low-density lipoprotein cholesterol, minimum stent diameter, total stent length, and use of statin at discharge. CI, confidence interval; HR, hazard ratio.

**Table S5. 2.4-year major adverse cardiovascular and cerebrovascular events in patients with and without dyslipidemia according to uric acid tertiles.**

| Group               | Dyslipidemia (n=7068) |                             |                      | No dyslipidemia (n=3418) |                             |                             |
|---------------------|-----------------------|-----------------------------|----------------------|--------------------------|-----------------------------|-----------------------------|
|                     | Event, n (%)          | Unadjusted HR (95%CI)       | Adjusted HR (95%CI)  | Event, n (%)             | Unadjusted HR (95%CI)       | Adjusted HR (95%CI)         |
| Low uric acid       | 263 (11.5)            | 1 (reference)               | 1 (reference)        | 111 (9.2)                | 1 (reference)               | 1 (reference)               |
| Medium uric acid    | 287 (12.3)            | 1.076 (0.910, 1.272)        | 1.074 (0.801, 1.442) | 115 (9.9)                | 1.099 (0.846, 1.426)        | 1.035 (0.858, 1.250)        |
| High uric acid      | 315 (12.9)            | 1.069 (0.985, 1.160)        | 1.022 (0.926, 1.129) | 142 (13.6)               | <b>1.251 (1.105, 1.416)</b> | <b>1.307 (1.127, 1.516)</b> |
| Per 1mg/dl increase | 865 (12.2)            | <b>1.047 (1.000, 1.097)</b> | 1.036 (0.981, 1.094) | 368 (10.8)               | <b>1.111 (1.035, 1.191)</b> | <b>1.124 (1.036, 1.219)</b> |

Adjusted for age, sex, body mass index, current smoking, diabetes, hypertension, dyslipidemia, previous myocardial infarction, previous stroke, acute coronary syndrome, systolic blood pressure, triglyceride, low-density lipoprotein cholesterol, minimum stent diameter, total stent length, and use of statin at discharge. CI, confidence interval; HR, hazard ratio.



**Table S6. 2.4-year major adverse cardiovascular and cerebrovascular events in patients with and without current smoking according to uric acid tertiles.**

| Group               | Current smoking (n=5990) |                       |                      | No current smoking (n=4496) |                             |                             |
|---------------------|--------------------------|-----------------------|----------------------|-----------------------------|-----------------------------|-----------------------------|
|                     | Event, n (%)             | Unadjusted HR (95%CI) | Adjusted HR (95%CI)  | Event, n (%)                | Unadjusted HR (95%CI)       | Adjusted HR (95%CI)         |
| Low uric acid       | 194 (11.9)               | 1 (reference)         | 1 (reference)        | 180 (9.6)                   | 1 (reference)               | 1 (reference)               |
| Medium uric acid    | 238 (11.5)               | 0.972 (0.804, 1.175)  | 0.982 (0.795, 1.213) | 164 (11.5)                  | 1.207 (0.977, 1.491)        | 1.137 (0.896, 1.444)        |
| High uric acid      | 295 (12.8)               | 1.051 (0.960, 1.151)  | 1.054 (0.949, 1.170) | 162 (13.5)                  | <b>1.205 (1.084, 1.340)</b> | <b>1.188 (1.042, 1.354)</b> |
| Per 1mg/dl increase | 727 (12.1)               | 1.037 (0.985, 1.093)  | 1.036 (0.977, 1.099) | 506 (11.3)                  | <b>1.101 (1.038, 1.167)</b> | <b>1.097 (1.021, 1.178)</b> |

Adjusted for age, sex, body mass index, current smoking, diabetes, hypertension, dyslipidemia, previous myocardial infarction, previous stroke, acute coronary syndrome, systolic blood pressure, triglyceride, low-density lipoprotein cholesterol, minimum stent diameter, total stent length, and use of statin at discharge. CI, confidence interval; HR, hazard ratio.

**Table S7. 2.4-year major adverse cardiovascular and cerebrovascular events in patients with and without metabolic syndrome according to uric acid tertiles.**

| Group               | Metabolic syndrome (n=5457) |                       |                      | No metabolic syndrome (n=5029) |                             |                             |
|---------------------|-----------------------------|-----------------------|----------------------|--------------------------------|-----------------------------|-----------------------------|
|                     | Event, n (%)                | Unadjusted HR (95%CI) | Adjusted HR (95%CI)  | Event, n (%)                   | Unadjusted HR (95%CI)       | Adjusted HR (95%CI)         |
| Low uric acid       | 203 (12.3)                  | 1 (reference)         | 1 (reference)        | 171 (9.3)                      | 1 (reference)               | 1 (reference)               |
| Medium uric acid    | 204 (11.8)                  | 0.962 (0.792, 1.168)  | 0.915 (0.740, 1.133) | 198 (11.2)                     | <b>1.230 (1.002, 1.509)</b> | 1.245 (0.982, 1.579)        |
| High uric acid      | 279 (13.5)                  | 1.063 (0.971, 1.164)  | 1.035 (0.930, 1.151) | 178 (12.5)                     | <b>1.179 (1.061, 1.309)</b> | <b>1.208 (1.060, 1.377)</b> |
| Per 1mg/dl increase | 686 (12.6)                  | 1.041 (0.991, 1.095)  | 1.029 (0.972, 1.090) | 547 (10.9)                     | <b>1.094 (1.029, 1.163)</b> | <b>1.112 (1.032, 1.199)</b> |

Adjusted for age, sex, body mass index, current smoking, diabetes, hypertension, dyslipidemia, previous myocardial infarction, previous stroke, acute coronary syndrome, systolic blood pressure, triglyceride, low-density lipoprotein cholesterol, minimum stent diameter, total stent length, and use of statin at discharge. CI, confidence interval; HR, hazard ratio. A definite diagnosis of metabolic syndrome was assigned in the presence of  $\geq 3$  of the following 5 cardiovascular risk factors: (1) body mass index  $> 30\text{kg/m}^2$ ; (2) triglycerides  $\geq 150\text{ mg/dL}$ ; (3) high-density lipoprotein cholesterol  $< 40\text{ mg/dL}$  in male or  $< 50\text{ mg/dL}$  in female; (4) systemic hypertension ( $\geq 130/\geq 85\text{ mmHg}$ ); and (5) diabetes or hemoglobin A1c  $\geq 6.0\text{mmol/L}$ .

**Table S8. 2.4-year major adverse cardiovascular and cerebrovascular events in male and female according to uric acid tertiles.**

| Group               | Male (n=8094) |                       |                      | Female (n=2392) |                             |                             |
|---------------------|---------------|-----------------------|----------------------|-----------------|-----------------------------|-----------------------------|
|                     | Event, n (%)  | Unadjusted HR (95%CI) | Adjusted HR (95%CI)  | Event, n (%)    | Unadjusted HR (95%CI)       | Adjusted HR (95%CI)         |
| Low uric acid       | 248 (11.5)    | 1 (reference)         | 1 (reference)        | 126 (9.4)       | 1 (reference)               | 1 (reference)               |
| Medium uric acid    | 332 (11.7)    | 1.031 (0.874, 1.215)  | 1.064 (0.887, 1.277) | 70 (10.4)       | 1.121 (0.837, 1.501)        | 1.032 (0.745, 1.428)        |
| High uric acid      | 402 (12.9)    | 1.073 (0.991, 1.161)  | 1.080 (0.986, 1.183) | 55 (14.6)       | <b>1.276 (1.089, 1.495)</b> | <b>1.217 (1.012, 1.464)</b> |
| Per 1mg/dl increase | 982 (12.1)    | 1.043 (0.998, 1.091)  | 1.050 (0.998, 1.104) | 251 (10.5)      | <b>1.131 (1.034, 1.238)</b> | 1.099 (0.990, 1.220)        |

Adjusted for age, sex, body mass index, current smoking, diabetes, hypertension, dyslipidemia, previous myocardial infarction, previous stroke, acute coronary syndrome, systolic blood pressure, triglyceride, low-density lipoprotein cholesterol, minimum stent diameter, total stent length, and use of statin at discharge. CI, confidence interval; HR, hazard ratio.

**Table S9. Clinical outcomes according to number of standard modifiable cardiovascular risk factors.**

| Clinical outcomes           | No. risk factor | Event, n (%) | Crude HR (95%CI)            | Adjusted HR (95%CI)         |
|-----------------------------|-----------------|--------------|-----------------------------|-----------------------------|
| MACCE                       | 0~1             | 221 (9.7)    | 1 (reference)               | 1 (reference)               |
|                             | 2~3             | 830 (12.0)   | <b>1.237 (1.066, 1.434)</b> | <b>1.182 (1.001, 1.395)</b> |
|                             | 4               | 182 (14.4)   | <b>1.227 (1.112, 1.353)</b> | <b>1.159 (1.027, 1.308)</b> |
| All-cause death             | 0~1             | 20 (0.9)     | 1 (reference)               | 1 (reference)               |
|                             | 2~3             | 84 (1.2)     | 1.371 (0.842, 2.233)        | 1.479 (0.852, 2.568)        |
|                             | 4               | 17 (1.3)     | <b>1.232 (0.892, 1.702)</b> | 1.037 (0.692, 1.553)        |
| Cardiac death               | 0~1             | 8 (0.4)      | 1 (reference)               | 1 (reference)               |
|                             | 2~3             | 40 (0.6)     | 1.634 (0.765, 3.491)        | 1.740 (0.721, 4.202)        |
|                             | 4               | 12 (0.9)     | <b>1.634 (1.045, 2.555)</b> | 1.411 (0.797, 2.498)        |
| Nonfatal MI                 | 0~1             | 20 (0.9)     | 1 (reference)               | 1 (reference)               |
|                             | 2~3             | 55 (0.8)     | 0.893 (0.535, 1.490)        | 0.859 (0.481, 1.534)        |
|                             | 4               | 20 (1.6)     | 1.336 (0.980, 1.821)        | 1.275 (0.864, 1.882)        |
| Stroke                      | 0~1             | 25 (1.1)     | 1 (reference)               | 1 (reference)               |
|                             | 2~3             | 131 (1.9)    | <b>1.708 (1.114, 2.620)</b> | 1.584 (0.992, 2.529)        |
|                             | 4               | 15 (1.2)     | 1.031 (0.749, 1.420)        | 0.911 (0.620, 1.339)        |
| Unplanned revascularization | 0~1             | 176 (7.7)    | 1 (reference)               | 1 (reference)               |
|                             | 2~3             | 628 (9.0)    | 1.173 (0.992, 1.386)        | 1.118 (0.927, 1.348)        |
|                             | 4               | 144 (11.4)   | <b>1.220 (1.093, 1.362)</b> | <b>1.176 (1.026, 1.348)</b> |

Adjusted for age, sex, body mass index, previous myocardial infarction, previous stroke, acute coronary syndrome, systolic blood pressure, triglyceride, low-density lipoprotein cholesterol, minimum stent diameter, total stent length, and use of statin at discharge. CI, confidence interval; HR, hazard ratio; MACCE, major adverse cardiovascular and cerebrovascular event; MI, myocardial infarction.

**Figure S1. Flowchart of the study.**

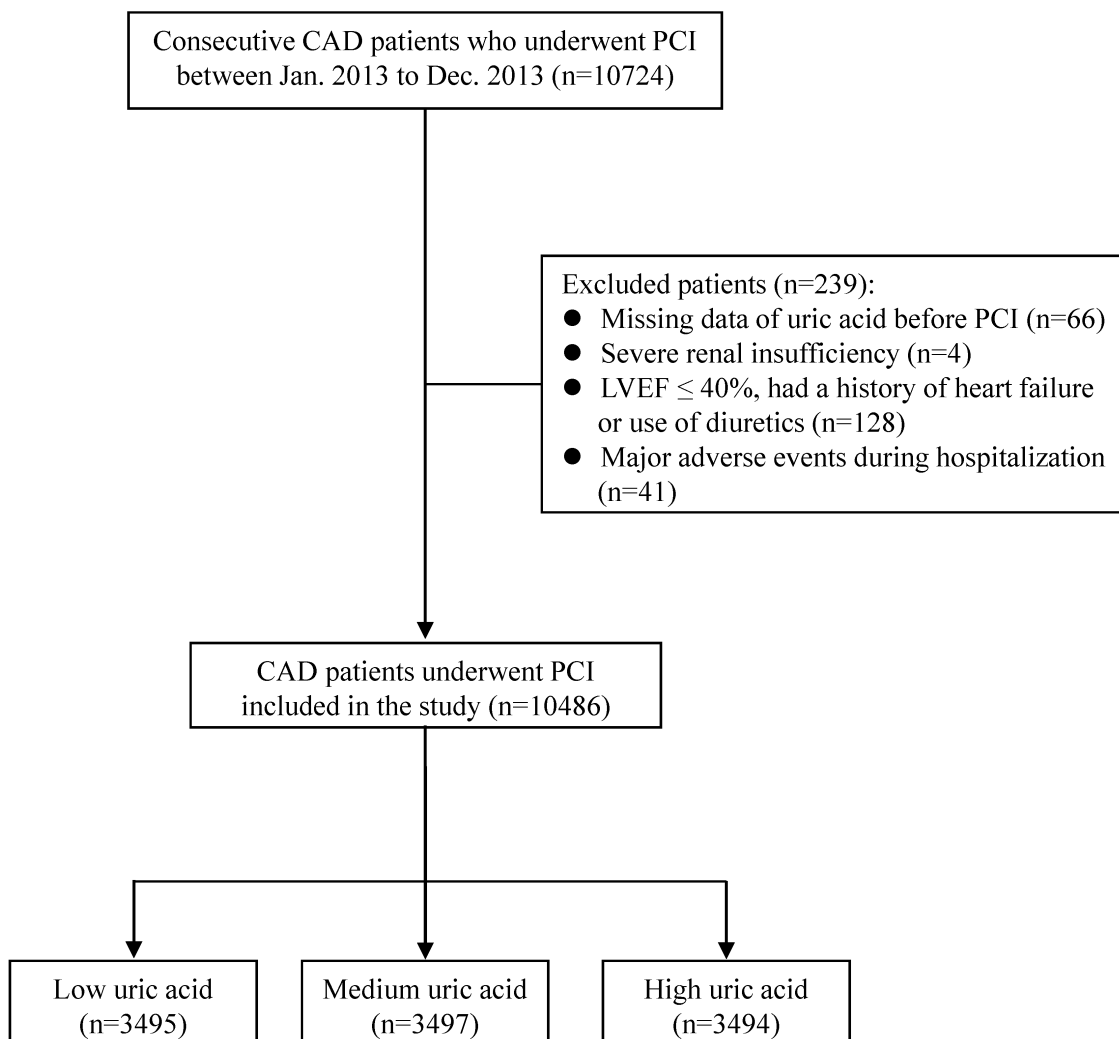

CAD, coronary artery disease; LVEF, left ventricular ejection fraction; PCI, percutaneous coronary intervention.

**Figure S2 Restricted cubic spline plots of the association between uric acid levels and major adverse cardiovascular and cerebrovascular events.**

**(A) Overall population**

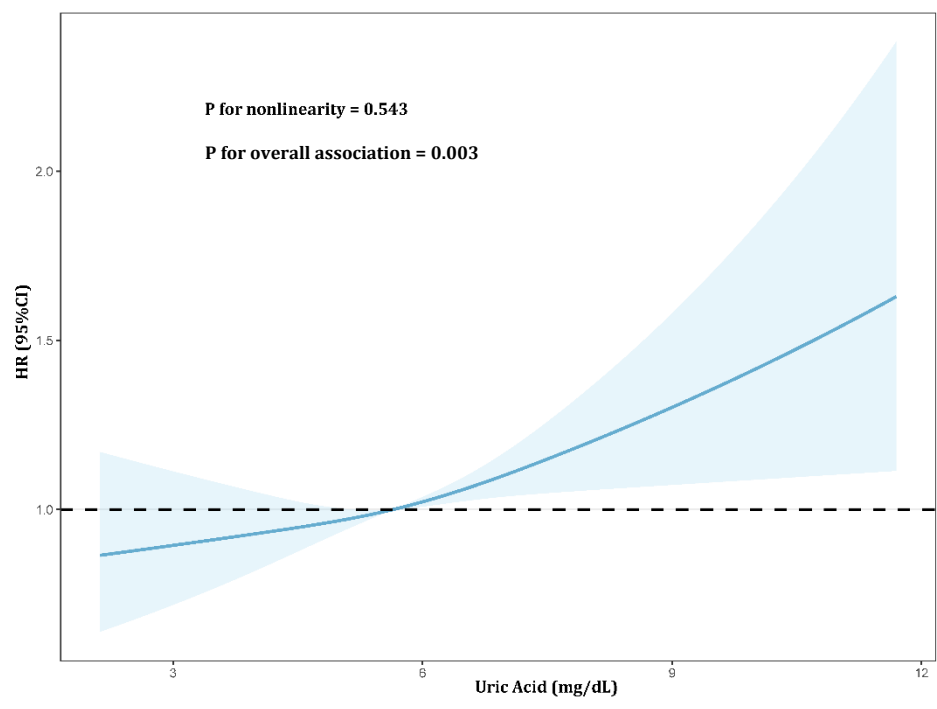

**(B) 0~1 standard modifiable cardiovascular risk factor**

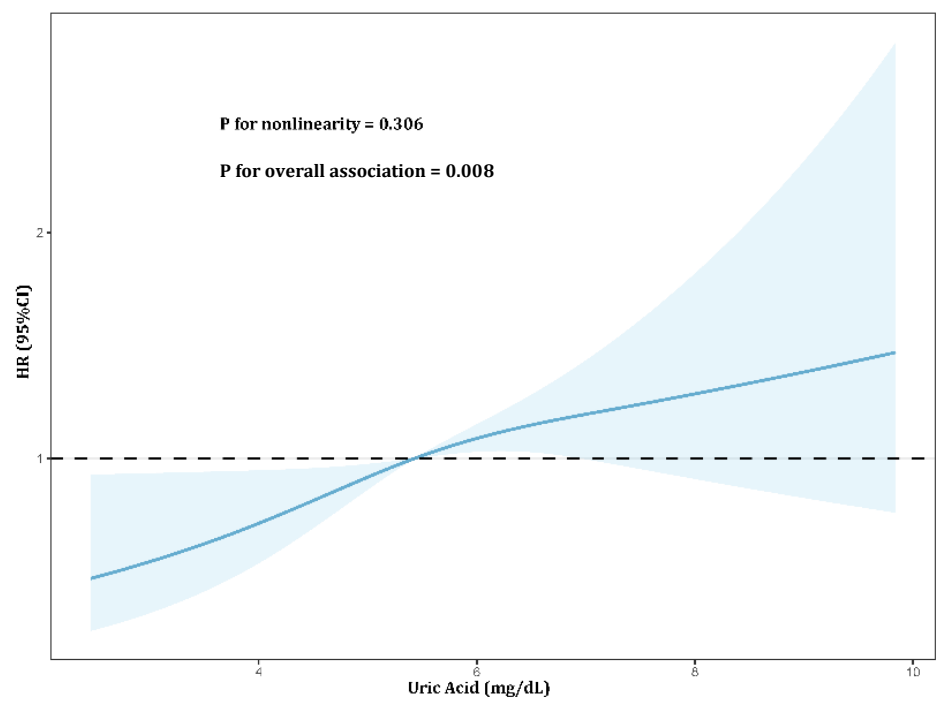

**(C) 2~3 standard modifiable cardiovascular risk factors**

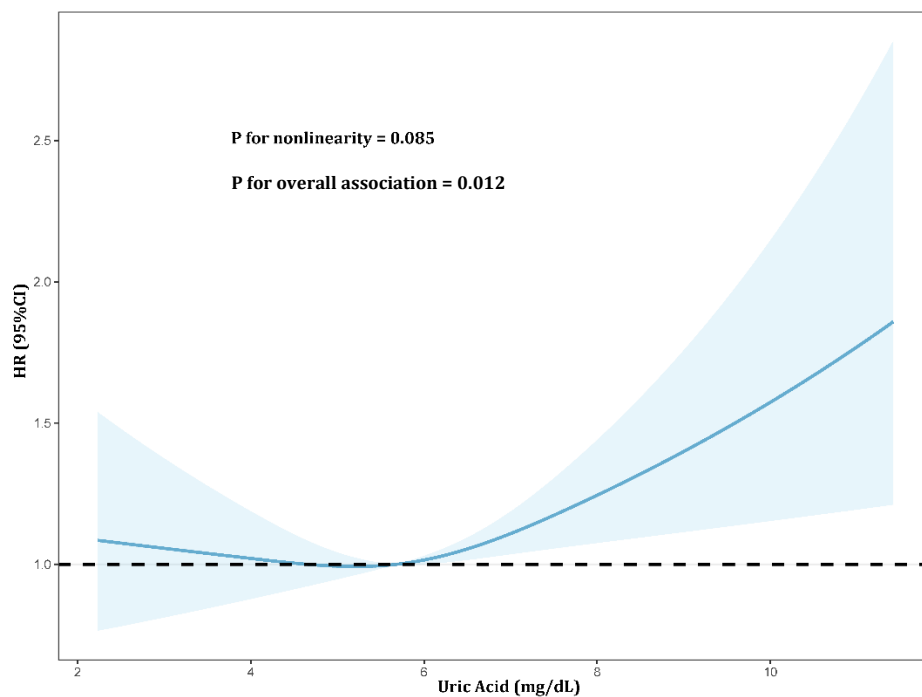

**(D) 4 standard modifiable cardiovascular risk factors**

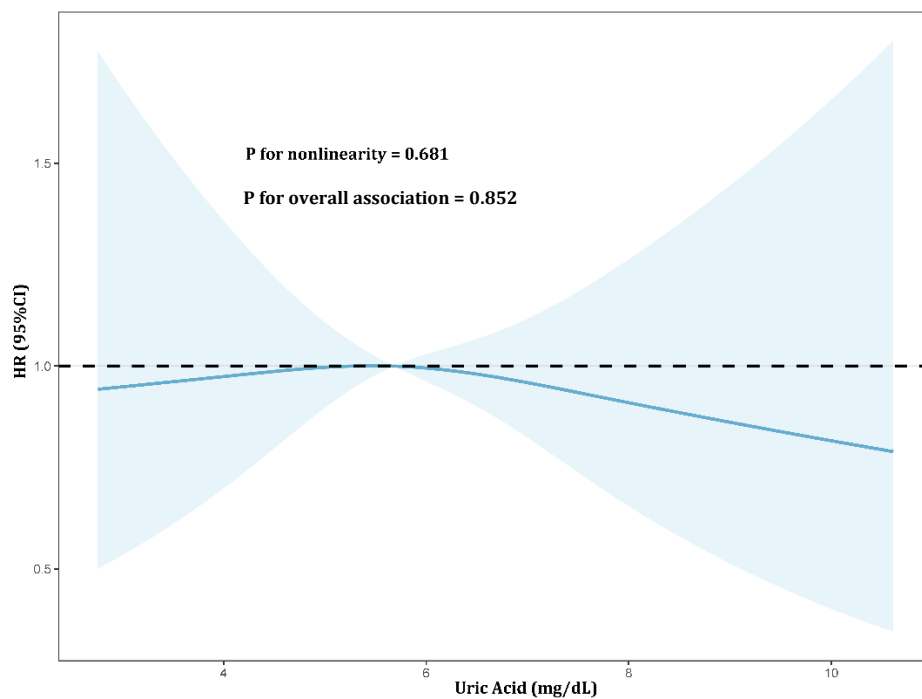

CI, confidence interval; HR, hazard ratio.

**Figure S3** The receiver operating characteristic curve of uric acid to predict major adverse cardiovascular and cerebrovascular event.

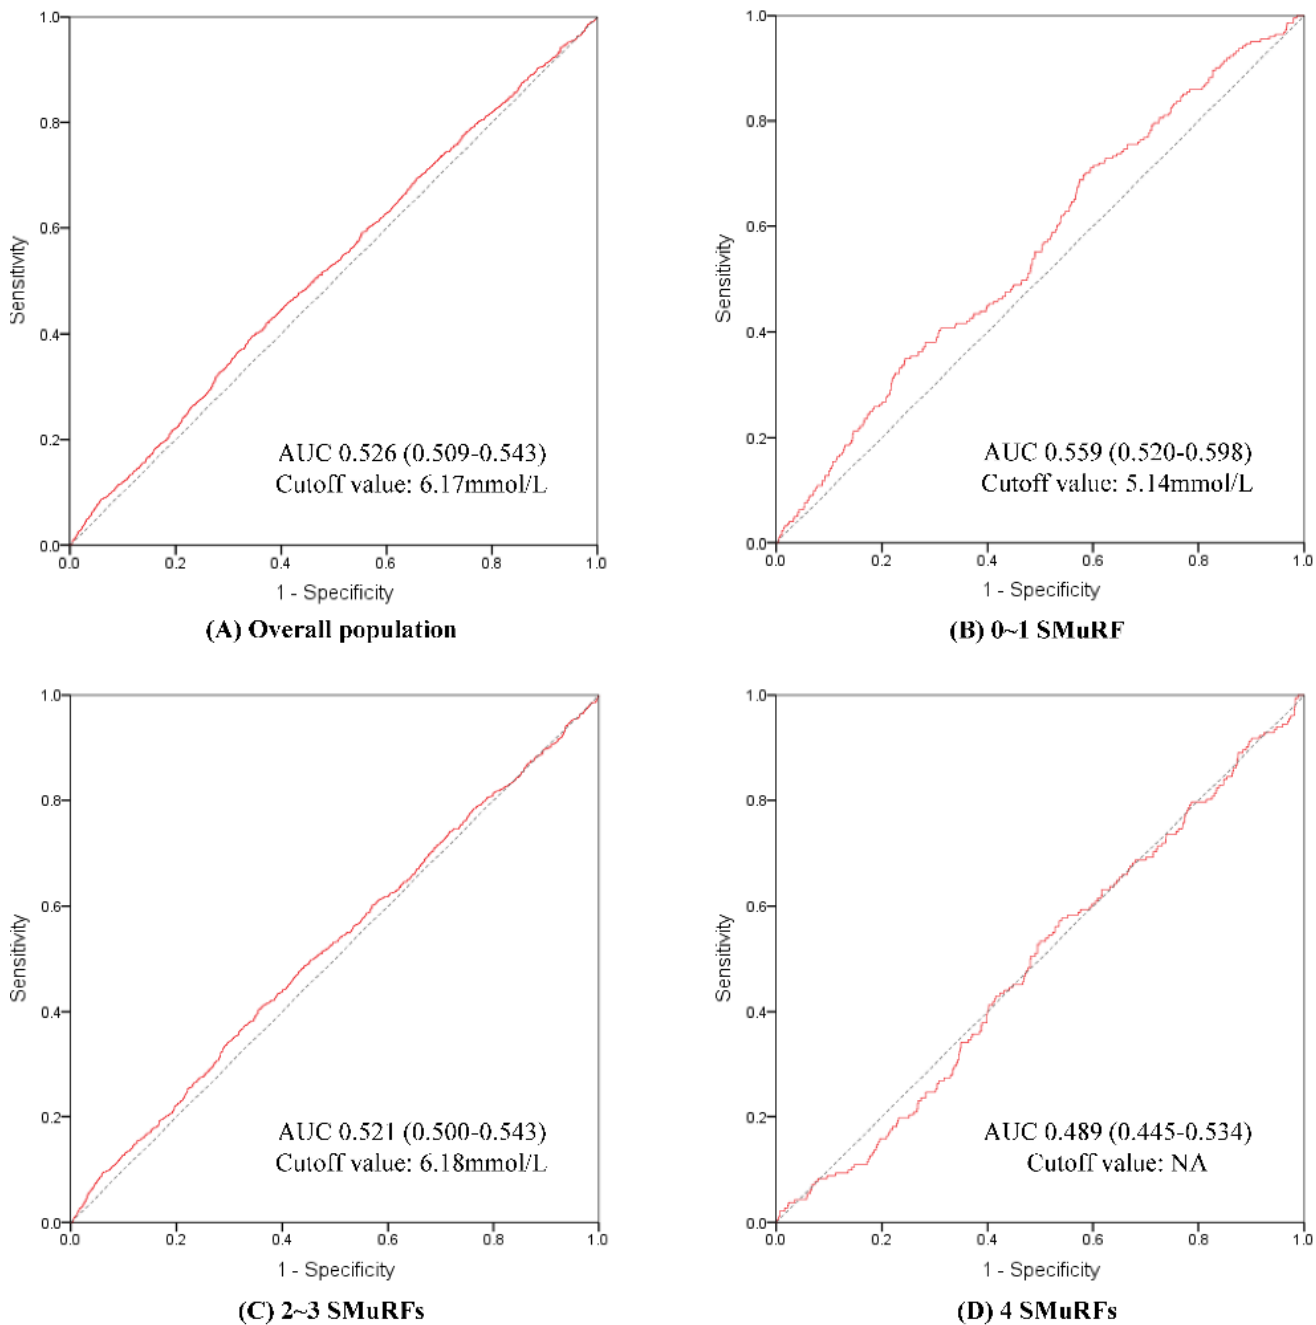

AUC, area under curve; NA, not applicable; SMuRF, standard modifiable cardiovascular risk factor.



Figure S4. Kaplan-Meier survival curves for secondary endpoints according to uric acid tertiles.

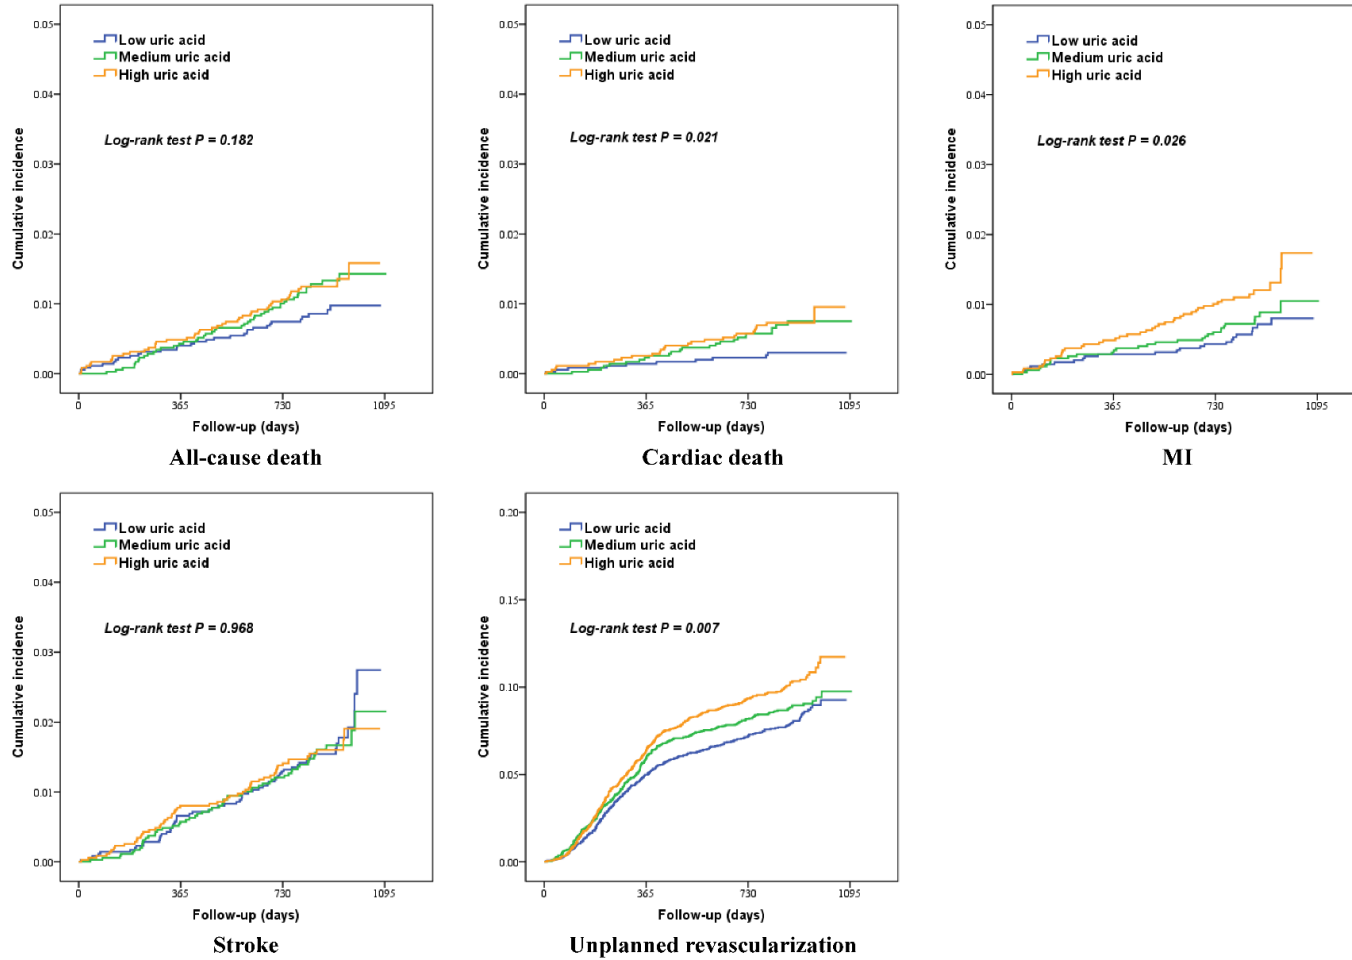

MI, myocardial infarction.

Figure S5. Kaplan-Meier survival curves for secondary endpoints according to different number of SMuRFs.

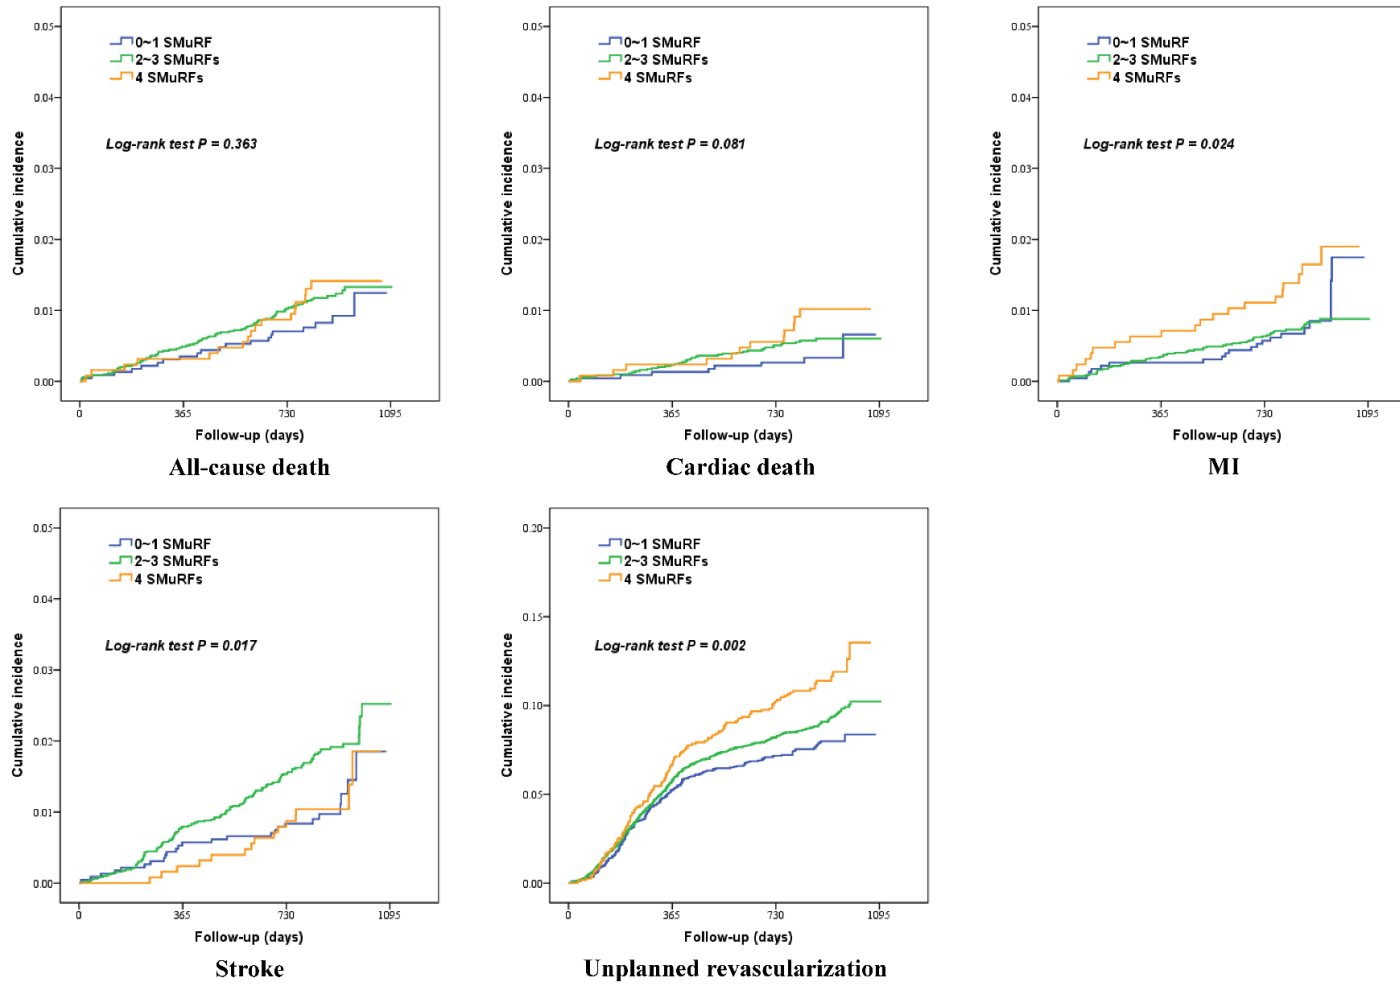

MI, myocardial infarction; SMuRFs, standard modifiable cardiovascular risk factors.

Figure S6. Kaplan-Meier survival curves for major adverse cardiovascular and cerebrovascular events according to serum uric acid tertiles in patients with different number of SMuRFs.

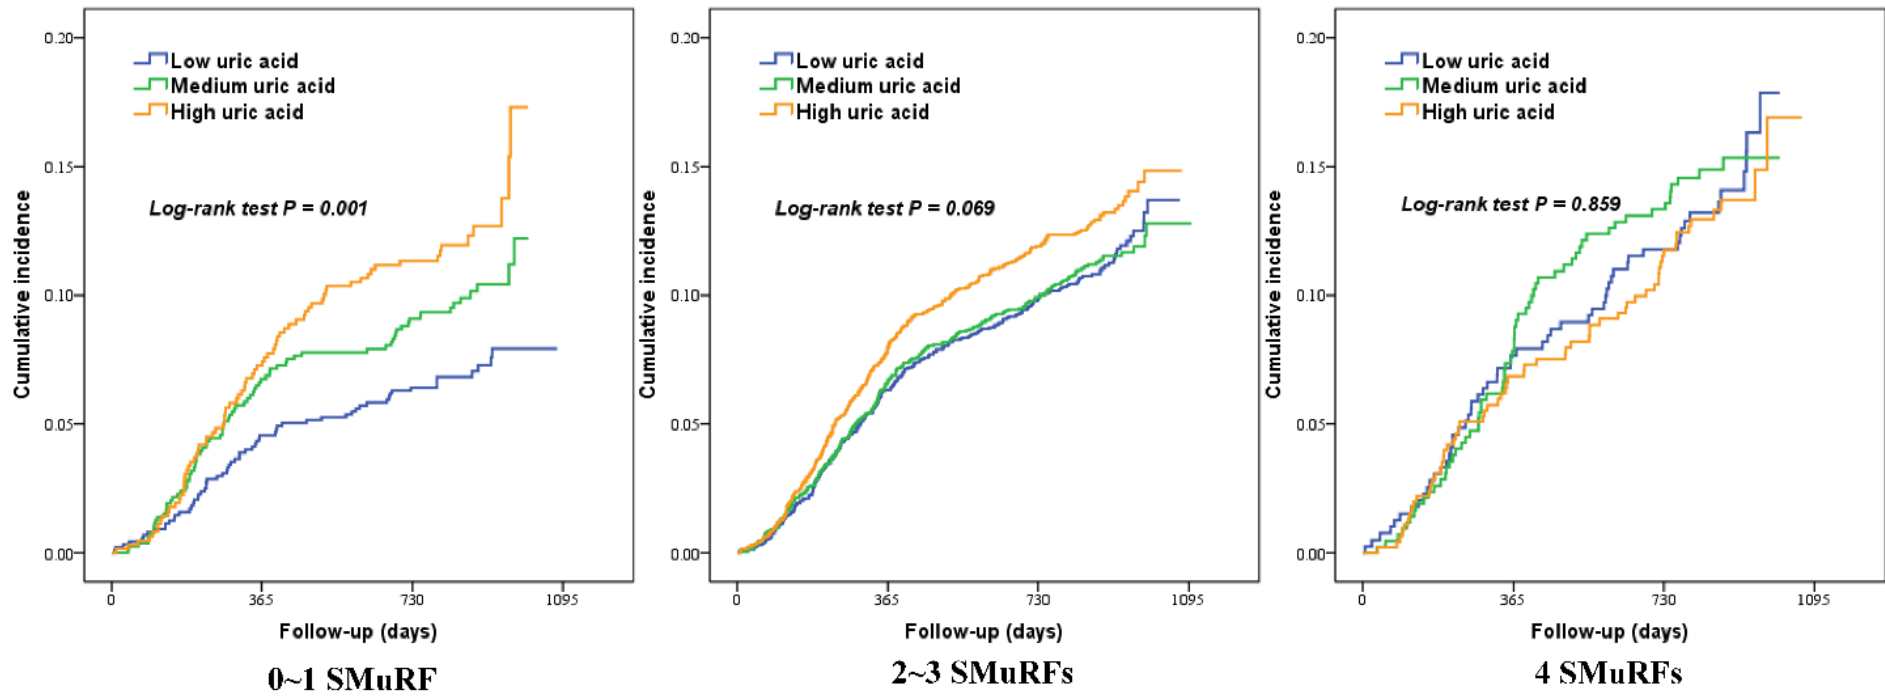

SMuRFs, standard modifiable cardiovascular risk factors.
